# Supplementary material for: Functional Classification of Genome-Scale Metabolic Networks
Source: PubMed Central journal article supplement (PMC3171432; doi:10.1155/2009/570456), 2009-01-19

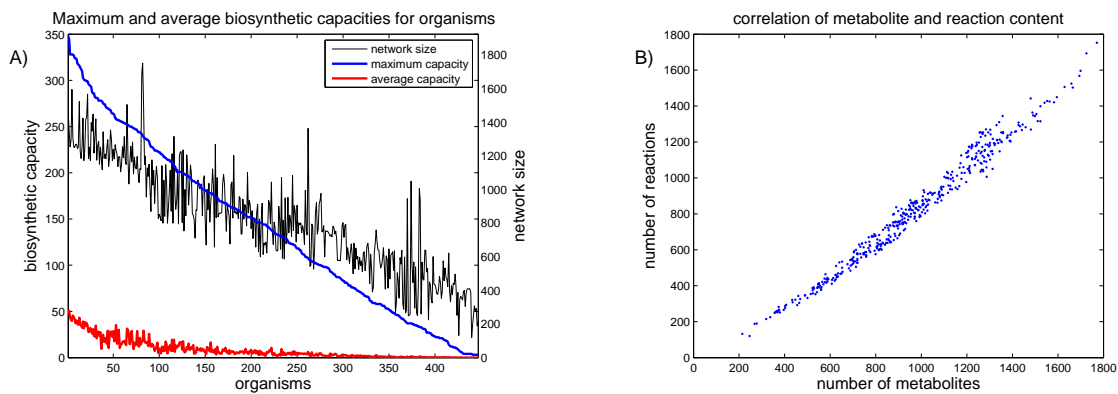

Figure S1: (A) Same as Fig. 2 in the main text but with the numbers of reactions used to indicate the network size instead of the numbers of metabolites. (B) Correlation between numbers of metabolites and numbers of reactions within all considered organism specific metabolic networks. The close similarity of Fig. S1A and Fig. 2 can be explained by the highly correlated metabolite and reaction content.

### Organisms clustered by carbon utilization spectra

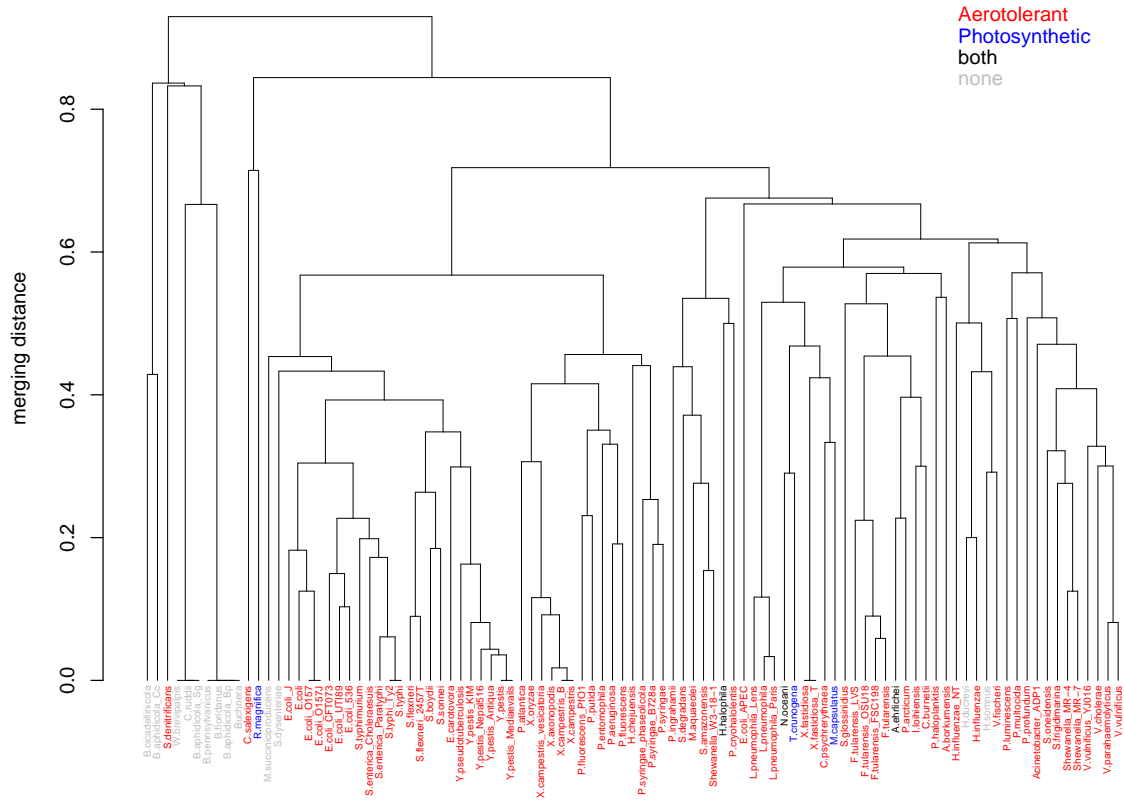

Figure S2: Same as Fig. 4 in the main text but organisms are color coded to represent the four lifestyle categories. Organisms in red are aerotolerant, organisms in blue potentially photosynthetic, organisms in black belong to both categories and organisms in grey to none of the two categories.

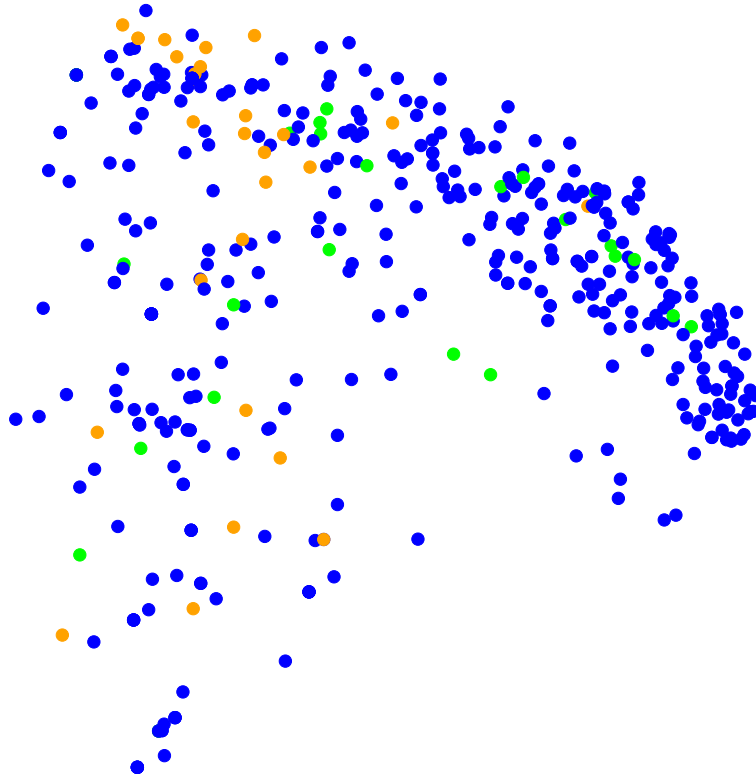

Figure S3: Multi-dimensional scaling plot based on distance  $d_{cus}^J$  with the three domains of life represented by different colors. Blue circles represent bacteria, green circles eukaryota and yellow circles archaea.

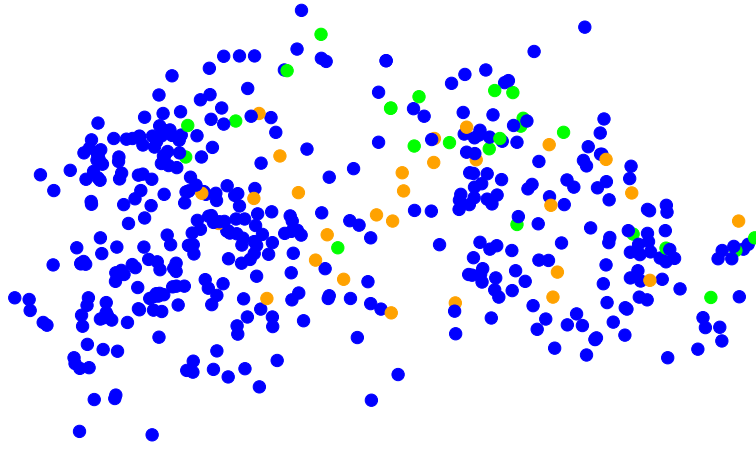

Figure S4: Multi-dimensional scaling plot based on distance  $d_{\text{profile}}$  with the three domains of life represented by different colors. Blue circles represent bacteria, green circles eukaryota and yellow circles archaea.



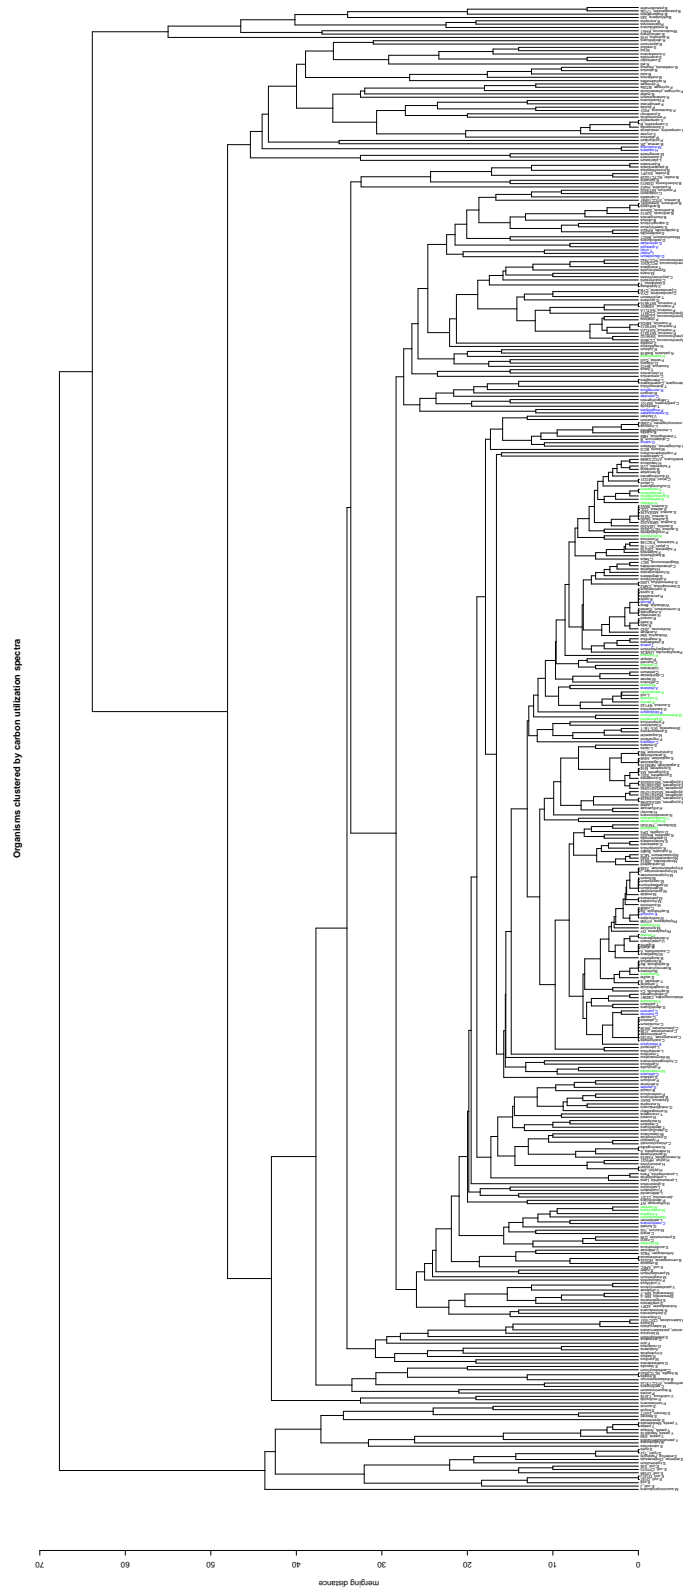

Figure S6: Cluster dendrogram including all 447 organisms retrieved by hierarchical clustering with the distances  $d_{\text{CUS}}$ .

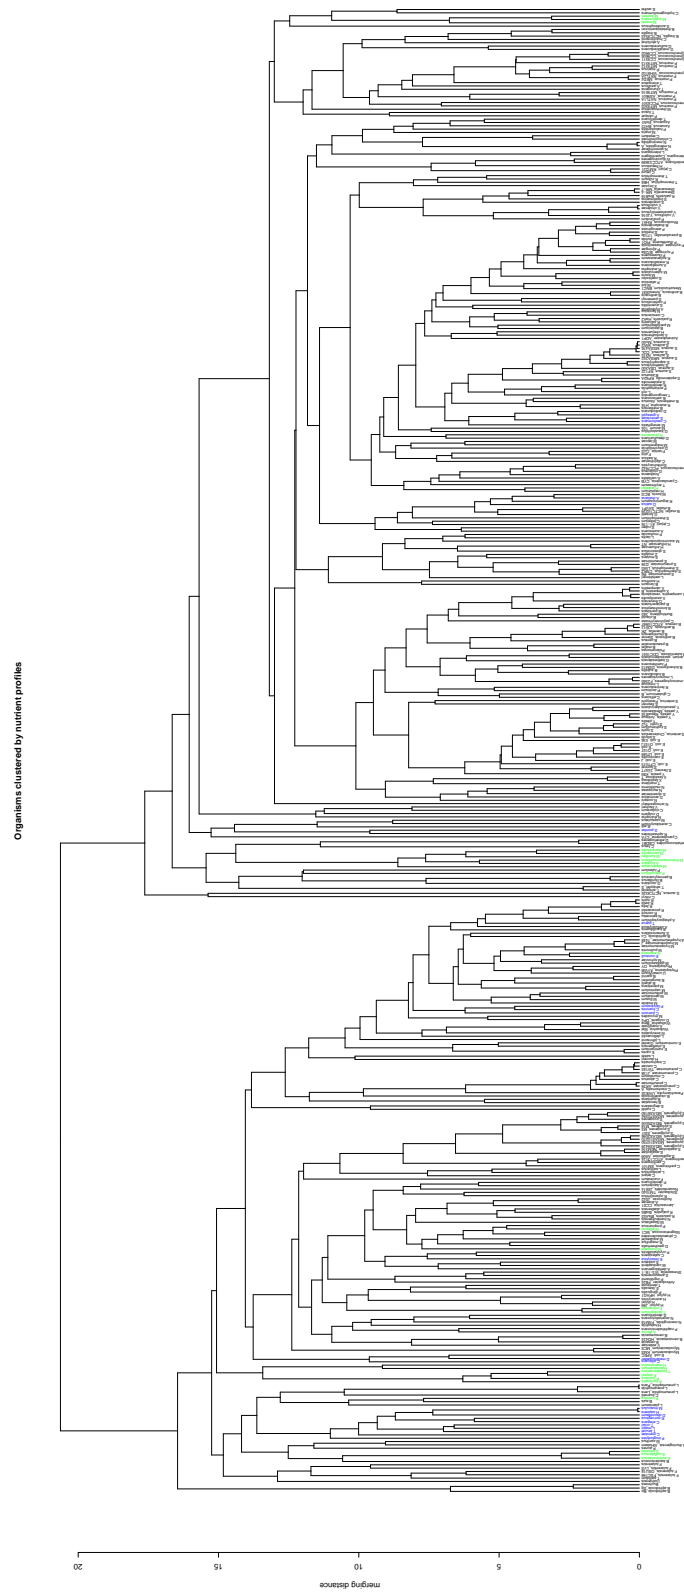

Figure S7: Cluster dendrogram of all considered 447 organisms retrieved by hierarchical clustering with the distances  $d_{\text{profile}}$ .

Table S1: Statistics for distances calculated from the carbon utilization spectra (jaccard distance). The expected value for the mean distance between two points is  $E(\bar{d}) = 0.741$ , the expected value for the fraction of small distances by definition  $E(n_c) = 0.1$ .

| ensemble (size)      | $\bar{d}$ | $p$ -value | $n_c$ | $p$ -value |
|----------------------|-----------|------------|-------|------------|
| RuBisCO (73)         | 0.687     | 0.0006     | 0.159 | 0.0008     |
| SOD+CAT (279)        | 0.668     | <0.0001    | 0.158 | <0.0001    |
| SOD+CAT+RuBisCO (41) | 0.678     | 0.0048     | 0.145 | 0.0452     |
| Bacteria (394)       | 0.738     | 0.1430     | 0.104 | 0.1314     |
| Eukaryota (24)       | 0.719     | 0.2492     | 0.159 | 0.0574     |
| Archaea (28)         | 0.646     | 0.0006     | 0.320 | <0.0001    |

Figure S8: Distributions supporting table S1 (carbon utilization spectra): Shown are the distributions (red) for the average distance (1st row) and the fraction of small distances (2nd row) of the 10000 test sets for the categories RuBisCO, SOD+CAT, SOD+CAT+RuBisCO, Bacteria, Eukaryota and Archaea (left to right) as well as the corresponding value of the ensembles themselves (marked by vertical green line).

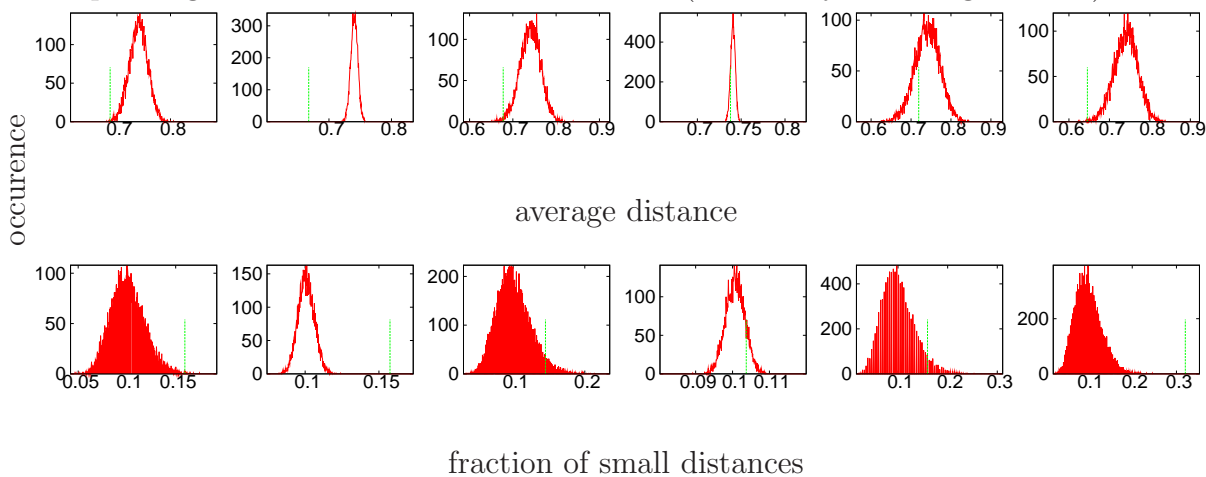



Table S2: Statistics for distances calculated from the nutrient profiles. The expected value for the mean distance between two points is  $E(\bar{d}) = 16.56$ , the expected value for the fraction of small distances by definition  $E(n_c) = 0.1$ .

| ensemble (size)      | $\bar{d}$ | $p$ -value | $n_c$ | $p$ -value |
|----------------------|-----------|------------|-------|------------|
| RuBisCO (73)         | 14.62     | <0.0001    | 0.185 | <0.0001    |
| SOD+CAT (279)        | 14.57     | <0.0001    | 0.171 | <0.0001    |
| SOD+CAT+RuBisCO (41) | 14.52     | 0.0011     | 0.218 | 0.0002     |
| Bacteria (394)       | 16.37     | 0.0011     | 0.114 | <0.0001    |
| Eukaryota (24)       | 13.92     | 0.0025     | 0.203 | 0.0136     |
| Archaea (28)         | 14.82     | 0.0153     | 0.111 | 0.3480     |

Figure S9: Distributions supporting table S2 (nutrient profiles): Shown are the distributions (red) for the average distance (1st row) and the fraction of small distances (2nd row) of the 10000 test sets for the categories RuBisCO, SOD+CAT, SOD+CAT+RuBisCO, Bacteria, Eukaryota and Archaea (left to right) as well as the corresponding value of the ensembles themselves (marked by vertical green line).

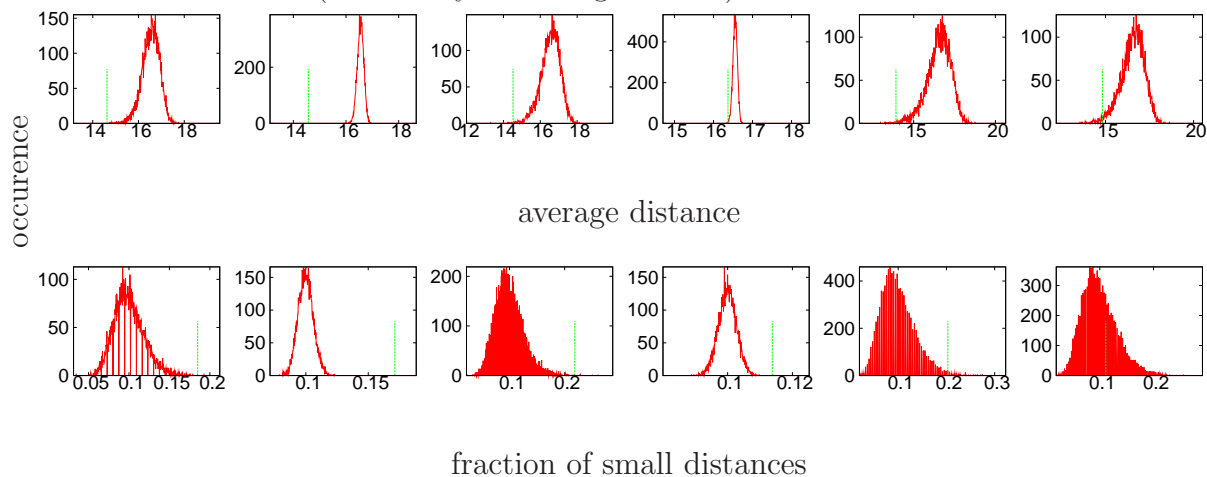

Supplement: 1687-4153-2009-570456-S1.pdf [file 1687-4153-2009-570456-S1.pdf]
